# Supplementary material for: Effect of an Infection Prevention and Control Training Program on Hemodialysis Nurses’ Performance in Governmental Hospitals in the Gaza Strip: A True Experimental Study
Source: Research Square preprint supplement (doi:10.21203/rs.3.rs-6714584/v1), 2025-06-30
Supplement: Supplementary file 1 [file 69a4b91f45af6e29c3ec4b2b.pdf]

## **Part I: Sociodemographic data**

This section classifies your personal data. Please read the terms carefully and answer them by placing a mark (✓) in front of the item that represents your case.

**Work place :-----**

**Age (years): -----**

**Gender:** ☐ Male ☐ Female

**Marital status:**

☐ Married ☐ Single ☐ Divorced ☐ Widow

**Educational level:**

☐ Diploma ☐ Bachelor ☐ Master

**Services offered in the facility**

☐ Adults ☐ Pediatric ☐ Both

**Years of Experience in hemodialysis unit : -----**

**Have you formally received training on infection control and prevention guideline in hemodialysis ?**

☐ Yes ☐ No

**If yes, How long ago?**

☐ Less than 1 year ☐ 1 – 5 years ☐ More than 5 years

**Part II: Nurse's Knowledge about Infection Control and Prevention**  
**in hemodialysis unit.**

**Select all correct answers in each question.** If you can't understand the language/terminology inform the researcher for interpretation verbally.

**1. Source of knowledge about Infection control and prevention in Hemodialysis unit is/are:**

- a. University .
- b. In-service .
- c. Conference.
- d. Workshop .

**2. Infection control and prevention ICP is defined as ?**

- a- A practical, evidence-based approach preventing patients and health workers from being harmed by avoidable infections.
- b- The discipline concerned with preventing healthcare-associated infections.
- c- A type of procedure that is carried out with the intent of preventing the transmission of communicable diseases by assessing, planning, implementing, and evaluating infection-control policies.
- d- A scientific approach and practical solution designed to prevent harm caused by infection to patients and health workers.

**3. Who is at risk of infection in Hemodialysis unit?**

- a. Health care worker.
- b. Patient.
- c. Visitors .
- d. Community.

**4. Hand Hygiene is Recommended :**

- a- Before and after patient contact.
- b- After touching patients surrounding s
- c- Before aseptic technique
- d- After body fluid exposure risk.

**5. The strategies to Control Health Care Association Infection are:**

- a. Eliminate of the causative agent .
- b. Reservoir control .
- c. Control Portal of entry and exit.
- d. Mode of transmission cycle break.

**6. Standard Precaution include which of the following steps?**

- a. Hand hygiene and personal protective equipment .
- b. Item processing and disinfection .
- c. Environmental cleaning and waste management .
- d. Respiratory hygiene and cough etiquette.

**7. What are the steps to take if you are exposed to Needle Stick Injury or Blood Splashes ?**

- a. Wash needle sticks and cuts with soap and water.
- b. Do not squeeze the site of injury .
- c. Report the incident and Immediately seek medical treatment.
- d. Flush splashes to the nose, mouth, or skin with water.

**8. Which of the following PPE should be worn before insertion Central Line Catheter ?**

- a. Sterile gown .
- b. Sterile gloves .
- c. Mask.
- d. Eye protection ,cap .

**9. Which of the following skin antiseptic used before Central Line Insertion in hemodialysis patient ?**

- a. Chlorhexidine 2% .
- b. Povidone iodine 10% .
- c. Chlorhexidine 0.5% + alcohol 70% .
- d. Alcohol 70%.

**10- Which of the following True statement about hemodialysis machine disinfection ?**

- a. The dialysis machines must be disinfected by thermal disinfection at the end of each day, by carrying out a complete cycle at a temperature of 80 C for 30 minutes.
- b. The machines must be disinfected between patient , by chemical disinfection according to manufacture recommendation.
- c. A low-level disinfectant can be used to clean soiled machine surfaces
- d. The disinfected surfaces should remain wet, then air drying to allow for sufficient contact time.

**11. Which of the following statement related to Safe Injection Practice ?**

- a. Prepare injections using aseptic technique in a clean area.
- b. Disinfect the rubber septum on a medication vial with alcohol before piercing.
- c. Do not use needles or syringes for more than one patient.
- d. Do not combine the leftover contents of single-use vials for later use.

**12-Which of the following example of Disinfectant?**

- a. Alcohol 70%.
- b. Glutaraldehyde.
- c. Ortho-phthalaldehyde.
- d. Hydrogen peroxide .

**13-Contact precaution are important to prevent transmission of :**

- a. Clostridium difficile (C. diff).
- b. MRSA(Methacillin Resistance Staff .aures ).
- c. VRE (Vancomycine resistance Enterococci).
- d. CRE (Carbapenem Resistance Enterobacteriaceae).

**14. Which of the following essential steps when Arteriovenous fistula/graft Cannulation?**

- a. Apply skin antiseptic ,and allow it to dry.
- b. Performed hand hygiene , Put on new clean gloves .
- c. Clean site with soap and water .
- d. Insert needle and connect to blood lines aseptically.

**15.Which of the following lab investigation should done to the patient in the first visiting to hemodialysis unit ?**

- a. HBsAg.
- b. anti -HBc total .
- c. anti-HBs .
- d. anti-HCV.

**16. At the end of Hemodialysis ,Machine Surface should be disinfected by**

- a. Chlorine500-1000ppm .
- b. Alcohol 70%.
- c. Survinous.
- d. Quaternary ammonium compounds

**17-Which of the following is true regarding Respiratory Hygiene and Cough Etiquette ?**

- a. Cough and sneeze on disposable napkins and disposed in no-touch receptacles then wash your hand.
- b. Cough and sneeze over shoulders if napkins not available.
- c. Keep distance of 3 feet from others when coughing .
- d. Cover your mouth and nose when coughing or sneezing.

**18- Linen and Textiles Management include which of the following statement ?**

- a. Contaminated linen and Textiles should be carefully removed with a minimum of agitation.
- b. Should not be sorted or prerinsed in patient care areas.
- c. Containing soiled items in a laundry bag or designated bin.
- d. Bags should sturdy enough (leak-resistant),and not fill to more than two third full.

**19- Management of Medical and sharp waste include which of the following step ?**

- a. Should be collected in plastic or water proof Container.
- b. Closed and collected when full for 2/3 or every 7 days .
- c. Used needles and syringes are discarded into safety box.
- d. Separated according to color code bags.

**20- Which of following Correct and safe procedures in the process of cleaning up blood spills and body fluids?**

- a. Control access to area around the spill
- b. Use absorbent disinfectant granules or pads to contain the spill
- c. Put on appropriate personal protective equipment
- d. Remove the contaminated waste using the scoop and scraper and carefully dispose of waste into infectious waste bag

**21-What are High touch Surfaces , that need frequent cleaning ?**

- a. Doorknobs
- b. Bedside work table
- c. Hand washing faucet handle
- d. Hemodialysis (HD) machine keyboard

**Part III: infection control and prevention practice in hemodialysis unit checklist**

| <b>Infection Control and Prevention Practice Observation Checklist</b> |             |                       |                         |                 |
|------------------------------------------------------------------------|-------------|-----------------------|-------------------------|-----------------|
| <b>The Candidate did the following</b>                                 | <b>Mark</b> | <b>Done correctly</b> | <b>Done incorrectly</b> | <b>Not done</b> |
| <b>Arteriovenous Fistula/Graft Cannulation Observation :</b>           |             |                       |                         |                 |
| Site cleaned with soap and water                                       |             |                       |                         |                 |
| Hand hygiene performed (staff)                                         |             |                       |                         |                 |
| New ,clean gloves worn                                                 |             |                       |                         |                 |
| Skin antiseptic applied appropriately                                  |             |                       |                         |                 |
| Skin antiseptic allowed to dry                                         |             |                       |                         |                 |
| No contact with fistula /graft site (after antiseptics )               |             |                       |                         |                 |
| Cannulation performed aseptically                                      |             |                       |                         |                 |
| Connect blood lines aseptically                                        |             |                       |                         |                 |
| Gloves removed                                                         |             |                       |                         |                 |
| hand hygiene performed                                                 |             |                       |                         |                 |
| <b>Arteriovenous Fistula/Graft Decannulation Observation :</b>         |             |                       |                         |                 |
| Hand hygiene performed                                                 |             |                       |                         |                 |
| New ,clean gloves worn                                                 |             |                       |                         |                 |
| Disconnect from blood line aseptically                                 |             |                       |                         |                 |
| Needles removed aseptically                                            |             |                       |                         |                 |
| Clean gloves worn (patient /staff) to compress site                    |             |                       |                         |                 |
| Clean gauze /bandage applied to site                                   |             |                       |                         |                 |

|                                                                                                                 |  |  |  |  |
|-----------------------------------------------------------------------------------------------------------------|--|--|--|--|
| If other activities performed between needle removed , hand hygiene is performed and new ,clean gloves are worn |  |  |  |  |
| Staff gloves removed                                                                                            |  |  |  |  |
| Staff hand hygiene performed                                                                                    |  |  |  |  |
| Patient gloves removed and hand hygiene performed (if applicable )                                              |  |  |  |  |
| <b>Catheter Connection Observation</b>                                                                          |  |  |  |  |
| Mask worn properly (if required)                                                                                |  |  |  |  |
| Hand hygiene performed                                                                                          |  |  |  |  |
| New ,clean gloves worn                                                                                          |  |  |  |  |
| Catheter hup scrubbed                                                                                           |  |  |  |  |
| Hub antiseptic allowed to dry                                                                                   |  |  |  |  |
| Catheter connected to blood lines aseptically                                                                   |  |  |  |  |
| Gloves removed                                                                                                  |  |  |  |  |
| Hand hygiene performed                                                                                          |  |  |  |  |
| <b>Catheter Disconnection Observation</b>                                                                       |  |  |  |  |
| Mask worn properly (if required)                                                                                |  |  |  |  |
| Hand hygiene performed                                                                                          |  |  |  |  |
| New ,clean gloves worn                                                                                          |  |  |  |  |
| Catheter removed from blood line aseptically                                                                    |  |  |  |  |
| Catheter hup scrubbed                                                                                           |  |  |  |  |
| Hub antiseptic allowed to dry                                                                                   |  |  |  |  |
| New caps attached aseptically (after disconnection )                                                            |  |  |  |  |
| Gloves removed                                                                                                  |  |  |  |  |
| Hand hygiene performed                                                                                          |  |  |  |  |
| <b>Catheter Exit Site Care Observation</b>                                                                      |  |  |  |  |
| Mask worn properly (if required)                                                                                |  |  |  |  |
| Hand hygiene performed                                                                                          |  |  |  |  |
| New ,clean gloves worn                                                                                          |  |  |  |  |
| Skin antiseptic applied appropriately                                                                           |  |  |  |  |
| skin antiseptic allowed to dry                                                                                  |  |  |  |  |
| No contact with exit site (after antiseptis)                                                                    |  |  |  |  |
| Antimicrobial ointment applied                                                                                  |  |  |  |  |
| Dressing applied aseptically                                                                                    |  |  |  |  |

|                        |  |  |  |  |
|------------------------|--|--|--|--|
| Gloves removed         |  |  |  |  |
| Hand hygiene performed |  |  |  |  |

| The candidate did the following                                       | Mark | Done correctly | Done incorrectly | Not done |
|-----------------------------------------------------------------------|------|----------------|------------------|----------|
| <b>Hemodialysis injectable medication preparation</b>                 |      |                |                  |          |
| Medication preparation done in designated area                        |      |                |                  |          |
| Medication preparation area is clean                                  |      |                |                  |          |
| All vials are inspected                                               |      |                |                  |          |
| Hand hygiene performed                                                |      |                |                  |          |
| Septum of all vials disinfected                                       |      |                |                  |          |
| All vials entered with new needle are new syringe                     |      |                |                  |          |
| Medication preparation done aseptically                               |      |                |                  |          |
| All single dose vials discarded                                       |      |                |                  |          |
| All multi dose vials discarded or stored properly                     |      |                |                  |          |
| <b>Hemodialysis injectable medication administration</b>              |      |                |                  |          |
| Medication properly transported to patient station                    |      |                |                  |          |
| Hand hygiene performed                                                |      |                |                  |          |
| Clean gloves worn                                                     |      |                |                  |          |
| Injection port disinfected with antiseptics                           |      |                |                  |          |
| Medication administered aseptically                                   |      |                |                  |          |
| Syringes discarded at point of use                                    |      |                |                  |          |
| Gloves removed                                                        |      |                |                  |          |
| Hand hygiene performed                                                |      |                |                  |          |
| <b>Hemodialysis station routine disinfection observation</b>          |      |                |                  |          |
| All supplies removed from station and prime bucket emptied            |      |                |                  |          |
| Gloves removed ,hand hygiene performed                                |      |                |                  |          |
| Station is empty before disinfection initiated                        |      |                |                  |          |
| New clean gloves worn                                                 |      |                |                  |          |
| Disinfection applied to all surfaces and prime bucket                 |      |                |                  |          |
| All surfaces are wet with disinfection                                |      |                |                  |          |
| All surfaces allowed to dry                                           |      |                |                  |          |
| Gloves removed and hand hygiene performed                             |      |                |                  |          |
| No supplies or patient brought to station until disinfection complete |      |                |                  |          |

**Thank You for Your Participation**
